# Supplementary material for: Patterns of stressful life events in pregnancy: A latent class approach linking trauma and birth outcomes
Source: Research Square preprint supplement (doi:10.21203/rs.3.rs-7166704/v1), 2025-09-01
Supplement: Supplementary file 1 [file eab64956b9f52d2e1a67836b.docx]

**Supplemental Material**

**Patterns of stressful life events in pregnancy: A latent class approach linking trauma and birth outcomes**

**Table of contents**

Table S1. Fit Statistics and Class Membership for Competing Latent Class Models (1–7 Classes).

Table S2. Pairwise Odds Ratios for Stressful Life Events Across Latent Classes.

**Table S1. Fit Statistics and Class Membership for Competing Latent Class Models (1–7 Classes).**

| Model | Free Parameters | Log-likelihood (H0) | AIC | BIC | Entropy | Vuong-Lo-Mendell-Rubin Test | LRT Adjusted Test | Class Counts & Proportions |
| --- | --- | --- | --- | --- | --- | --- | --- | --- |
| 1 Class | 13 | -25334.06 | 50694.119 | 50779.507 | -- | -- | -- | 1: 1204 (22.88%) |
| 2 Class | 27 | -23457.627 | 46969.254 | 47146.597 | 0.774 | < 0.001 | < 0.001 | 1: 1204 (22.88%) |
| 2: 4057 (77.12%) |
| 3 Class | 41 | -23080.766 | 46243.533 | 46512.832 | 0.727 | < 0.001 | < 0.001 | 1: 1047 (19.89%) |
| 2: 879 (16.70%) |
| 3: 3337 (63.42%) |
| 4 Class | 55 | -22890.828 | 45891.655 | 46252.91 | 0.709 | 0.0001 | 0.0001 | 1: 1041 (19.79%) |
| 2: 299 (5.68%) |
| 3: 2977 (56.57%) |
| 4: 945 (17.96%) |
| 5 Class | 69 | -22731.785 | 45601.571 | 46054.781 | 0.74 | 0.0011 | 0.0013 | 1: 858 (16.31%) |
| 2: 275 (5.23%) |
| 3: 591 (11.22%) |
| 4: 455 (8.65%) |
| 5: 3083 (58.59%) |
| 6 Class | 83 | -22684.939 | 45535.879 | 46081.045 | 0.746 | 0.7331 | 0.734 | 1: 161 (3.06%) |
| 2: 153 (2.90%) |
| 3: 896 (17.03%) |
| 4: 474 (9.01%) |
| 5: 621 (11.80%) |
| 6: 2957 (56.20%) |
| 7 Class | 97 | -22639.035 | 45472.07 | 46109.191 | 0.758 | 0.234 | 0.2439 | 1: 804 (15.27%) |
| 2: 243 (4.61%) |
| 3: 460 (8.75%) |
| 4: 576 (10.94%) |
| 5: 2991 (56.84%) |
| 6: 160 (3.04%) |
| 7: 29 (0.55%) |

Note: Models were estimated using maximum likelihood with robust standard errors (MLR) in Mplus 8.4, incorporating survey weights and the complex sampling design. Fit indices include the log-likelihood (H₀), Akaike Information Criterion (AIC), Bayesian Information Criterion (BIC), and entropy. The Vuong-Lo-Mendell-Rubin likelihood ratio test and the Lo-Mendell-Rubin adjusted LRT test compare each model to one with k–1 classes. Class counts and proportions reflect the distribution of respondents across latent classes in each solution.

| **Table S2. Pairwise Odds Ratios for Stressful Life Events Across Latent Classes.** | | | | | | | | | | |
| --- | --- | --- | --- | --- | --- | --- | --- | --- | --- | --- |
| Item | Class_1 vs Class_2 | Class_1 vs Class_3 | Class_1 vs Class_4 | Class_1 vs Class_5 | Class_2 vs Class_3 | Class_2 vs Class_4 | Class_2 vs Class_5 | Class_3 vs Class_4 | Class_3 vs Class_5 | Class_4 vs Class_5 |
| Family Member Hospitalized | 2.20 | **17.27** | **22.04** | **35.40** | **7.85** | **10.02** | **16.10** | 1.28 | 2.05 | 1.61 |
| Divorce or Separation | **0.07** | 1.03 | **0.11** | 4.83 | **13.80** | 1.47 | **64.95** | **0.11** | 4.71 | **44.11** |
| Moved | **0.18** | 0.75 | 0.69 | 1.96 | 4.25 | 3.89 | **11.05** | 0.92 | 2.60 | 2.84 |
| Partner Lost Job | **0.04** | **0.07** | 0.57 | 3.49 | 2.06 | **16.15** | **99.42** | **7.85** | **48.34** | **6.16** |
| Lost Job | **0.02** | **0.07** | **0.19** | 1.51 | 3.56 | **9.15** | **72.61** | 2.57 | **20.38** | **7.94** |
| Cut Work Hours or Pay | **0.08** | **0.05** | 4.14 | 3.07 | 0.57 | **49.56** | **36.83** | **86.54** | **64.30** | 0.74 |
| Problems Paying Rent or Mortgage | **0.02** | **0.09** | **0.17** | 3.39 | **5.49** | **10.77** | **210.63** | 1.96 | **38.37** | **19.56** |
| Partner Away | 0.78 | 1.52 | 0.92 | 2.14 | 1.95 | 1.18 | 2.74 | 0.61 | 1.41 | 2.32 |
| Partner Arguments | **0.08** | 0.35 | **0.07** | 2.63 | 4.61 | 0.91 | **34.35** | **0.20** | **7.46** | **37.62** |
| Partner Did Not Want Pregnancy | **0.13** | 0.90 | **0.10** | **5.19** | **6.99** | 0.79 | **40.52** | **0.11** | **5.80** | **51.34** |
| Someone Close Had a Drug or Alcohol Problem | **0.17** | 2.48 | 0.50 | **9.69** | **14.98** | 3.02 | **58.50** | **0.20** | 3.90 | **19.38** |
| Experienced Homelessness | **0.00** | **0.06** | **0.03** | 0.50 | **24.31** | **11.95** | **209.81** | 0.49 | **8.63** | **17.56** |
| Close Person Died | 1.75 | **20.18** | **20.61** | **40.67** | **11.53** | **11.78** | **23.25** | 1.02 | 2.02 | 1.97 |

Note. This table presents pairwise odds ratios comparing the likelihood of endorsing each stressful life event across all combinations of latent classes identified in the five-class solution. Odds ratios were derived from conditional response probabilities in the latent class model estimated using Mplus 8.4 with survey weights and complex sampling corrections. Values greater than 1 indicate higher odds of endorsing the item in the first class listed compared to the second. Bolded values in the final manuscript may be used to highlight comparisons with significant between-class differences or those relevant to the interpretation of class meaning.
